# Supplementary material for: Activation of sodium percarbonate by cysteine complexation of Fe(ii) for the degradation of acetaminophen in water
Source: Royal Society of Chemistry journal article supplement (doi:10.1039/d3nj05902b), 2024-01-01
Supplement: d3nj05902b1.pdf [file d3nj05902b1.pdf]

## Supplementary material

### Activation of Sodium Percarbonate by Cysteine Complexation of Fe(II) for The Degradation of Acetaminophen in Water

Yingzi Lin<sup>a,b,c,\*</sup>, Ningning Sun<sup>b</sup>, Qingyu Zhang<sup>b,d</sup>, Lei Chen<sup>b</sup>, Shengbo Sun<sup>e</sup>, Hong Yang<sup>f</sup>,  
Jing Chen<sup>b</sup>, Qixuan Weng<sup>b</sup>, Shuang Xue<sup>a,g</sup>

<sup>a</sup> Key Laboratory of Songliao Aquatic Environment, Ministry of Education, Jilin Jianzhu  
University, Changchun 130118, China

<sup>b</sup> School of Municipal & Environmental Engineering, Jilin Jianzhu University, Changchun  
130118, China

<sup>c</sup> Jilin Province Key Laboratory of Water Pollution Control and Resource Reuse, Jilin Jianzhu  
University, Changchun 130118, China

<sup>d</sup> Wuhan Dongyan Intelligence Design Institute Co.,Ltd, Wuhan 430056, China

<sup>e</sup> The First Bethune Hospital of Jilin University, Jilin University, Changchun, China

<sup>f</sup> Shanghai Investigation, Design & Research Institute Co., Ltd, Shanghai, China

<sup>g</sup> School of Environmental Science, Liaoning University, Shenyang 110036, China

**\*corresponding author: Yingzi Lin, E-mail address: linyingzi@jlju.edu.cn,**

**Tel: +86-13844908048, Fax: +86-431-84566150**

## **Content**

**Table S1** Fukui function values for each atom in the ACT molecule

**Table S2** Acetaminophen oxidation intermediates

**Table S3** Prediction results of ACT and its oxidation product toxicity by T.E.S.T

**Table S1** Fukui function values for each atom in the ACT molecule

| Atom  | q(N-1)  | q(N+1)  | q(N)    | $f_i^0$       | $f_i^-$       | $f_i^+$       |
|-------|---------|---------|---------|---------------|---------------|---------------|
| 1(C)  | 0.0041  | -0.0989 | -0.0602 | 0.0515        | 0.0643        | 0.0387        |
| 2(C)  | -0.0086 | -0.1428 | -0.0716 | 0.0671        | 0.0630        | <b>0.0712</b> |
| 3(C)  | 0.1512  | -0.0122 | 0.0681  | <b>0.0817</b> | <b>0.0831</b> | <b>0.0802</b> |
| 4(C)  | 0.0114  | -0.0966 | -0.0533 | 0.0540        | 0.0647        | 0.0433        |
| 5(C)  | 0.0083  | -0.1286 | -0.0462 | <b>0.0685</b> | 0.0545        | <b>0.0824</b> |
| 6(C)  | 0.1107  | -0.0203 | 0.0333  | 0.0655        | <b>0.0775</b> | 0.0536        |
| 7(H)  | 0.0769  | 0.0091  | 0.0395  | 0.0339        | 0.0374        | 0.0304        |
| 8(H)  | 0.0790  | -0.0008 | 0.0403  | 0.0399        | 0.0387        | 0.0411        |
| 9(H)  | 0.0888  | 0.0166  | 0.0502  | 0.0361        | 0.0386        | 0.0336        |
| 10(H) | 0.0718  | 0.0111  | 0.0429  | 0.0303        | 0.0289        | 0.0317        |
| 11(N) | -0.0018 | -0.1057 | -0.0771 | 0.0520        | <b>0.0753</b> | 0.0286        |
| 12(H) | 0.1593  | 0.1006  | 0.1267  | 0.0294        | 0.0326        | 0.0262        |
| 13(C) | 0.2057  | 0.0657  | 0.1711  | <b>0.0700</b> | 0.0346        | <b>0.1055</b> |
| 14(C) | -0.0703 | -0.1220 | -0.0873 | 0.0258        | 0.0170        | 0.0347        |
| 15(H) | 0.0480  | 0.0062  | 0.0327  | 0.0209        | 0.0152        | 0.0266        |
| 16(H) | 0.0736  | 0.0085  | 0.0508  | 0.0326        | 0.0229        | 0.0423        |
| 17(H) | 0.0737  | 0.0087  | 0.0508  | 0.0325        | 0.0229        | 0.0421        |
| 18(O) | -0.2073 | -0.3965 | -0.2909 | <b>0.0946</b> | <b>0.0836</b> | <b>0.1056</b> |
| 19(O) | -0.0922 | -0.2522 | -0.1984 | <b>0.0800</b> | <b>0.1061</b> | 0.0538        |
| 20(H) | 0.2178  | 0.1503  | 0.1787  | 0.0337        | 0.0391        | 0.0284        |

**Table S2** Acetaminophen oxidation intermediates

| Oxidation products | m/z | Chemical formula                                              | Structure                                                                             |
|--------------------|-----|---------------------------------------------------------------|---------------------------------------------------------------------------------------|
| Acetaminophen      | 151 | C <sub>8</sub> H <sub>9</sub> NO <sub>2</sub>                 | 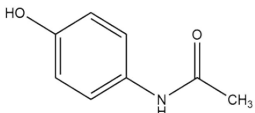   |
| P1                 | 128 | C <sub>6</sub> H <sub>10</sub> NO <sub>2</sub> <sup>+</sup>   |    |
| P2                 | 111 | C <sub>6</sub> H <sub>6</sub> O <sub>2</sub>                  |    |
| P3                 | 218 | C <sub>12</sub> H <sub>10</sub> O <sub>4</sub>                |   |
| P4                 | 73  | C <sub>3</sub> H <sub>7</sub> NO                              |  |
| P5                 | 196 | C <sub>8</sub> H <sub>8</sub> O <sub>4</sub> N <sub>2</sub>   |  |
| P6                 | 59  | C <sub>2</sub> H <sub>5</sub> NO                              |  |
| P7                 | 262 | C <sub>13</sub> H <sub>14</sub> N <sub>2</sub> O <sub>4</sub> |  |

**Table S3** Prediction results of ACT and its oxidation product toxicity by T.E.S.T

| Substance | Fish<br>96h-<br>LC50 | Water<br>flea<br>48h-<br>LC50 | Tetrahyme<br>na<br>pyriformis<br>48h-IGC50 | Oral rat<br>LD50 ( mg/kg) | bioacc<br>umulat<br>ion<br>facto | Develo<br>-<br>pmenta<br>l<br>Toxicit<br>y | Ames<br>Muta-<br>genici<br>ty |
|-----------|----------------------|-------------------------------|--------------------------------------------|---------------------------|----------------------------------|--------------------------------------------|-------------------------------|
| ACT       | 71.26                | 26.05                         | 187.68                                     | 1633.98                   | 3.24                             | 0.72                                       | 0.20                          |
| P1        | 74.53                | 29.52                         | 228.47                                     | 1892.95                   | -                                | -                                          | -                             |
| P2        | 35.32                | 12.92                         | 98.51                                      | 369.99                    | 11.80                            | 0.63                                       | 0.08                          |
| P3        | 15.6                 | 10.89                         | 33.87                                      | 2529.32                   | 11.00                            | 0.65                                       | 0.55                          |
| P4        | 213.44               | 1022.18                       | 218.75                                     | 1184.34                   | -                                | 0.52                                       | 0.52                          |
| P5        | 96.58                | 35.93                         | 184.96                                     | 2734.58                   | 1.51                             | 0.64                                       | 0.80                          |
| P6        | 802.98               | 347.72                        | 4867.35                                    | 2865.25                   | 0.60                             | 0.77                                       | 0.03                          |
| P7        | 62.21                | 20.58                         | 133.76                                     | 616.44                    | -                                | 0.86                                       | 0.57                          |
